# Supplementary material
Source: publisher figshare collection journal article supplement (https://acs.figshare.com/ndownloader/files/4554904)

## **Supporting Information**

### **Development of novel aminoglycoside (NB54) with reduced toxicity and enhanced suppression of disease-causing premature stop mutations**

Igor Nudelman<sup>†,‡</sup>, Annie Rebibo-Sabbah<sup>§,‡</sup>, Marina Cherniavsky<sup>†</sup>, Valery Belakhov<sup>†</sup>,  
Mariana Hainrichson<sup>†</sup>, Fuquan Chen<sup>⊥</sup>, Jochen Schacht<sup>⊥</sup>, Daniel S. Pilch<sup>#</sup>, Tamar Ben-  
Yosef<sup>§</sup>, and Timor Baasov<sup>\*,†</sup>

#### **Table of Contents**

Page S2: **Figure S1.** Comparative *in vitro* stop codon readthrough levels promoted by amikacin and kanamycin A in the p2luc vector.

Page S3: **Figure S2.** Drug-induced hair cell loss in cochlear explants.

Page S4-S6: HPLC-ESI-MS analysis for the purity determination of compounds **1** and **2**.

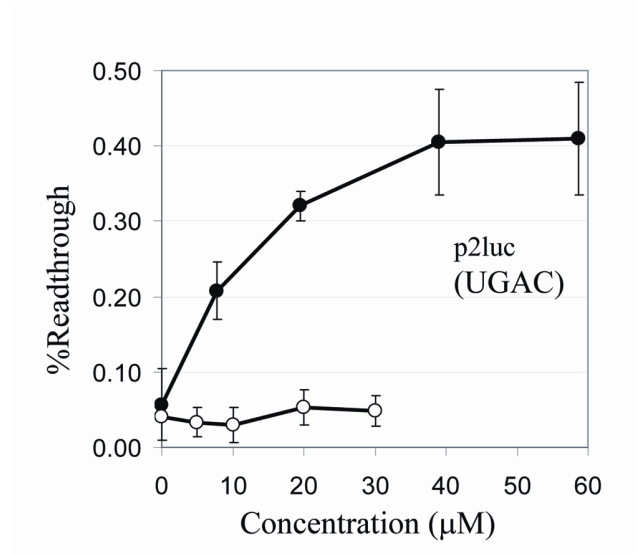

**Figure S1.** Comparative *in vitro* stop codon readthrough levels promoted by amikacin (●) and kanamycin A (○) in the p2luc vector. The p2luc vector was transcribed and translated using TNT quick coupled transcription/translation system. The amount of the translated products was evaluated using the dual luciferase reporter assay system and the suppression level was calculated as described into the manuscript. The results are averages of at least three independent experiments.

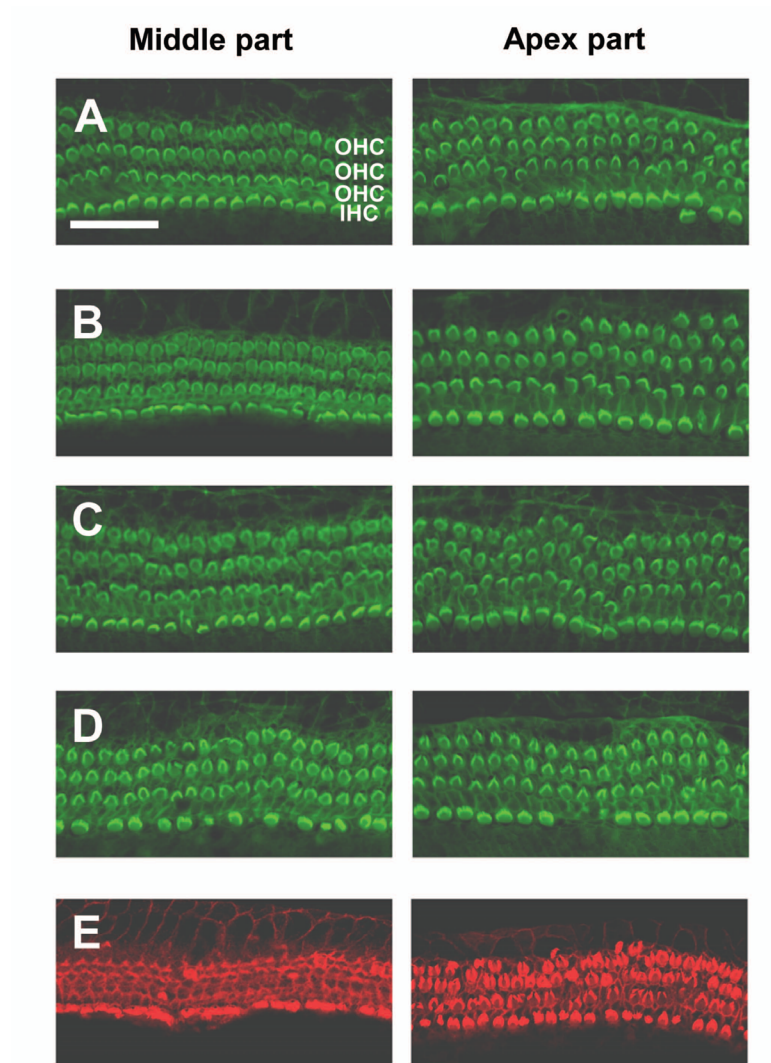

**Figure S2.** Drug-induced hair cell loss in cochlear explants. Sections of the middle and apex parts are shown. (A) 0.1 mM NB30, (B) 1 mM NB30, (C) 0.1 mM NB54, (D) 1 mM NB54 and (E) 0.2 mM gentamicin. A-D show essentially normal morphology, and cell loss is almost complete in E. “OHC” indicates outer, “IHC” inner hair cells. Size bar indicates the increment of 40  $\mu\text{m}$ .

HPLC-ESI-MS analysis for the purity determination of compounds **1** and **2**.

The HPLC system consisted of an Acquity UPLC from Waters. The chromatographic separation was achieved using a Phenomenex Luna Hilic 3.0 $\mu$  2.0x150mm column. Sample aliquots of 1  $\mu$ L were injected onto the HPLC column. The flow-rate of the eluent was 300  $\mu$ L/min and the mobile phase gradient is shown in tables 1-2. A LCT Premier mass spectrometer from Waters under ESI conditions was used for mass detection in positive and negative modes.

**Table 1S.** HPLC-ESI-MS conditions for separation of compound **2** (NB54).

| Time Duration (min) | 0.1% Formic acid in Acetonitrile (%) | 30mM ammonium formate pH=3 in Water (%) |
|---------------------|--------------------------------------|-----------------------------------------|
| 0                   | 75                                   | 25                                      |
| 10                  | 75                                   | 25                                      |
| 20                  | 50                                   | 50                                      |
| 23                  | 50                                   | 50                                      |
| 24                  | 75                                   | 25                                      |
| 32                  | 75                                   | 25                                      |

**Table 2S.** HPLC-ESI-MS conditions for separation of compound **1** (NB30).

| Time Duration (min) | 0.1% Formic acid in Acetonitrile (%) | 30mM ammonium formate pH=3 in Water (%) |
|---------------------|--------------------------------------|-----------------------------------------|
| 0                   | 85                                   | 15                                      |
| 15                  | 50                                   | 50                                      |
| 20                  | 50                                   | 50                                      |
| 21                  | 85                                   | 15                                      |
| 31                  | 85                                   | 15                                      |

**Table 3S.** HPLC-ESI-MS retention times, purity and HRMS analysis of compounds **1-2**.

| Compound        | Retention time (min) | Purity (%) | HRMS m/z |
|-----------------|----------------------|------------|----------|
| <b>1</b> (NB30) | 9.74                 | 98.69      | 455.2360 |
| <b>2</b> (NB54) | 12.20                | 95.55      | 555.2842 |

23-Feb-2009  
Ba\_1134A NB-30B

column HILIC luna 3micr 150\*2mm

Baazov

2: TOF MS ES-

TIC

5.37e5

# Compound 1 (NB30)

| Time  | Height | Area      | Area% |
|-------|--------|-----------|-------|
| 3.43  | 8969   | 1129.64   | 0.74  |
| 9.74  | 474214 | 149710.56 | 98.69 |
| 14.74 | 2453   | 857.94    | 0.57  |

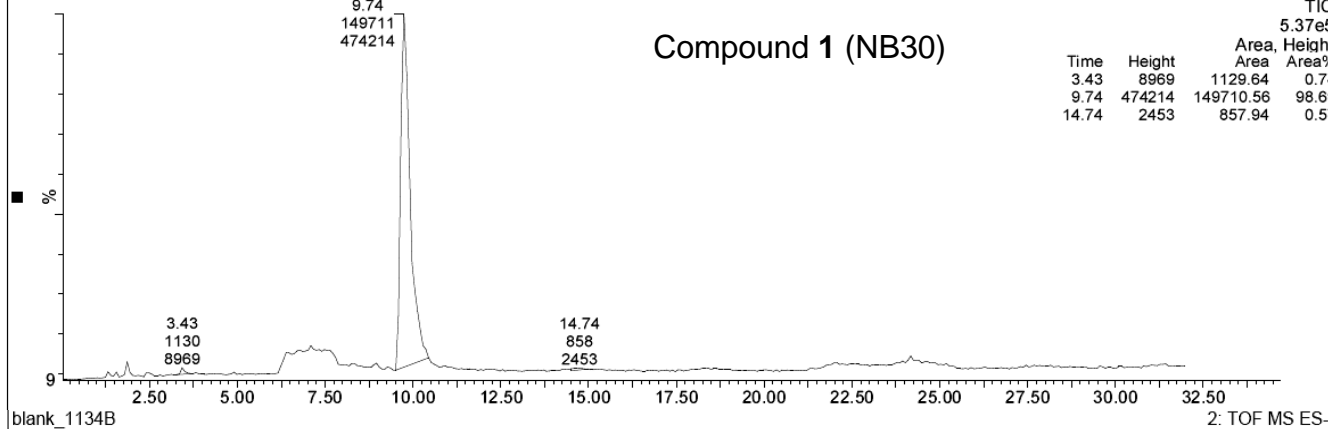

2: TOF MS ES-

TIC

2.37e5

# Blank

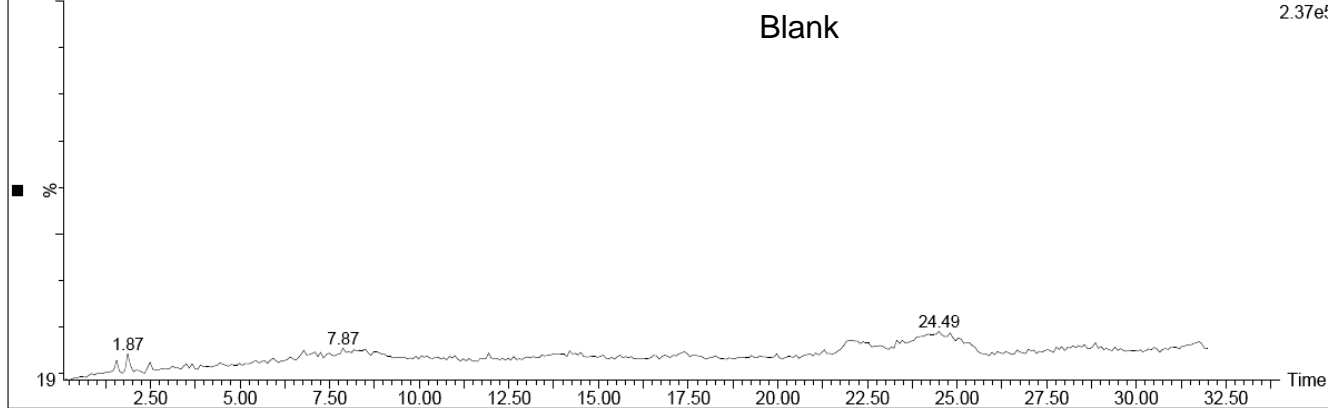

23-Feb-2009

Ba\_1134A NB-30B 127 (9.899) Cm (127:143-55:58)

column HILIC luna 3micr 150\*2mm

M-H<sup>+</sup>

Baazov

2: TOF MS ES-

2.28e4

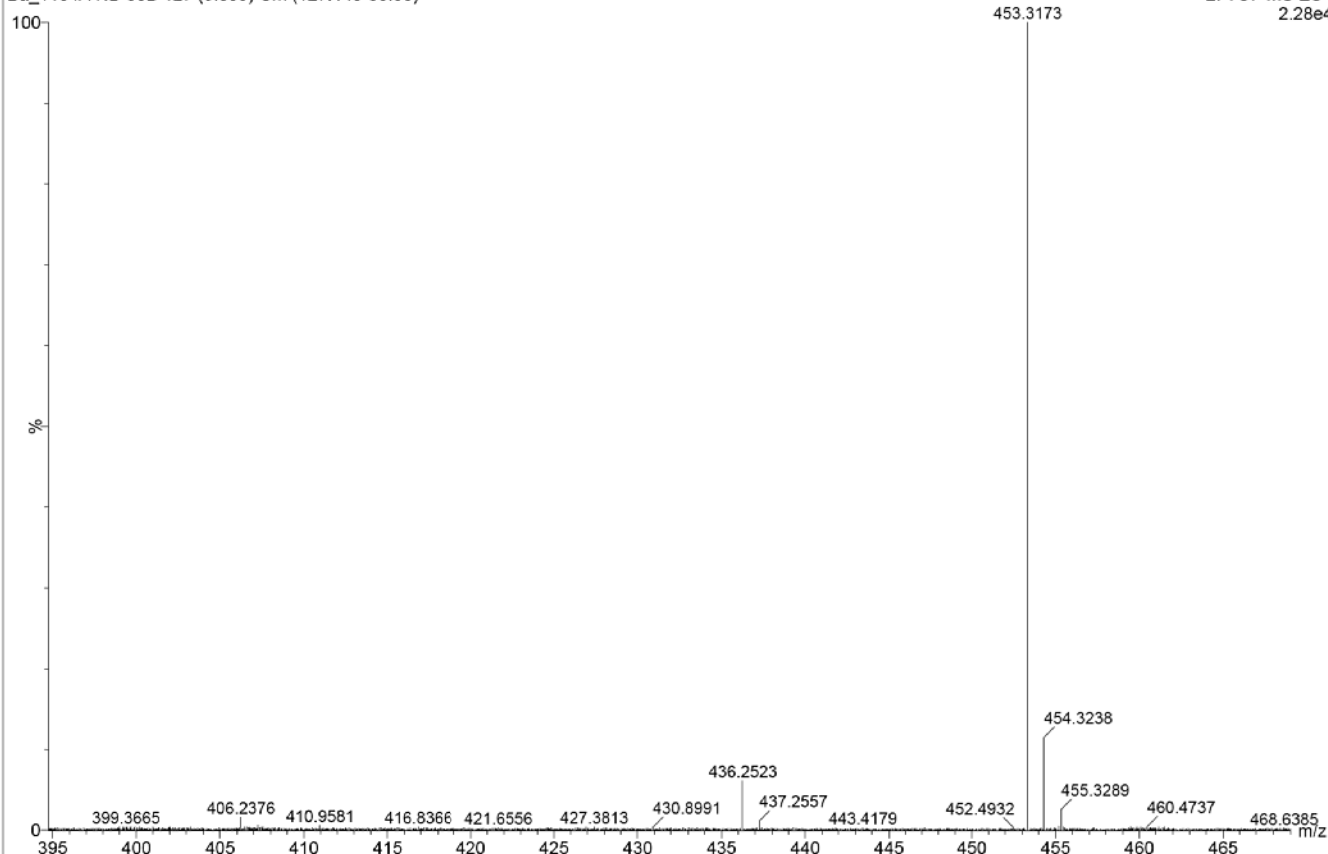

19-Feb-2009

Ba\_1133G

column HILIC luna 3micr 150\*2mm

Baazov

1: TOF MS ES+

## Compound 2 (NB54)

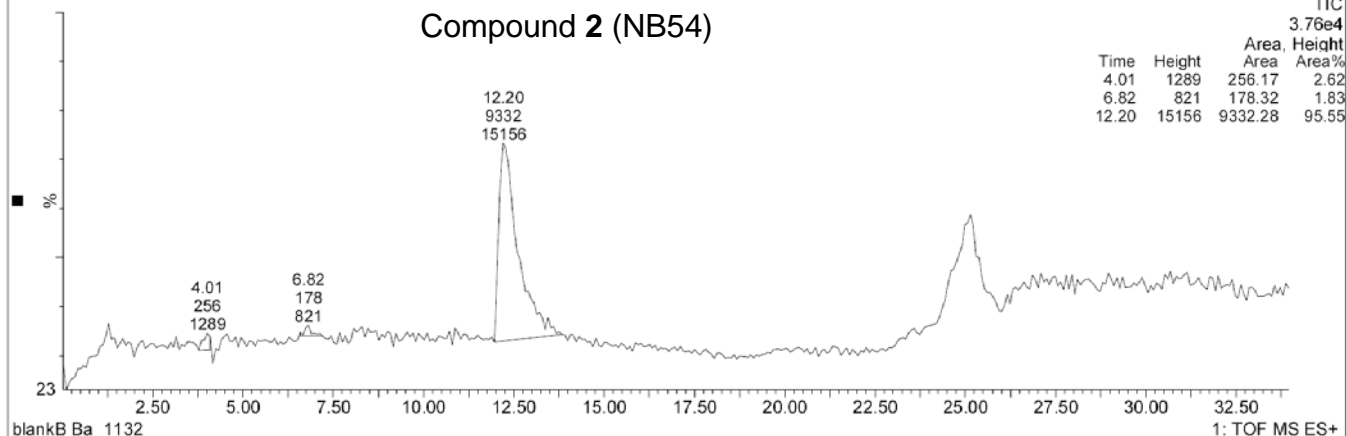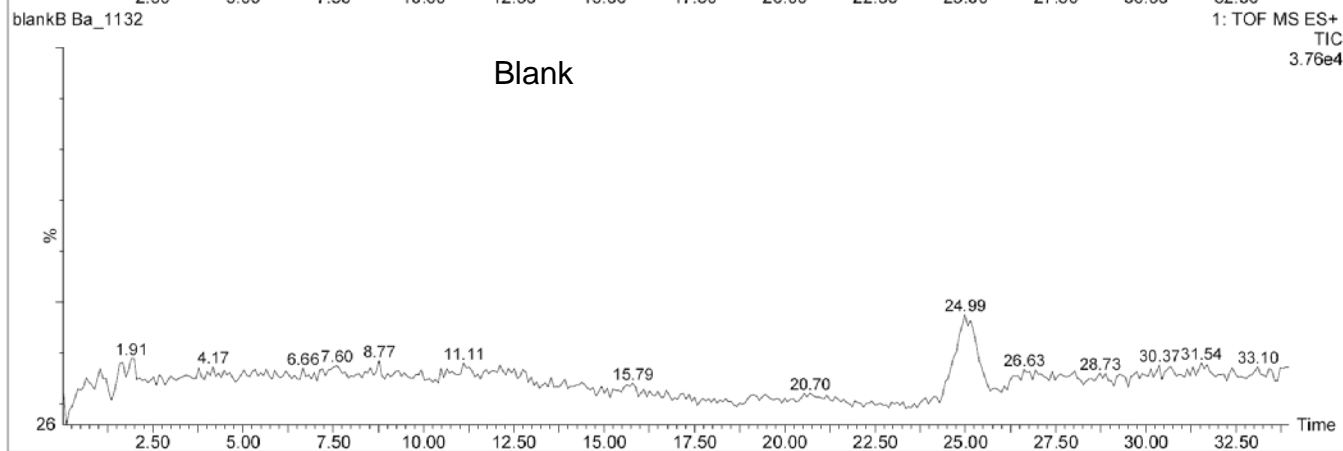

19-Feb-2009

Ba\_1133G 157 (12.199) Cm (155:185-94:111)

column HILIC luna 3micr 150\*2mm

Baazov

1: TOF MS ES+

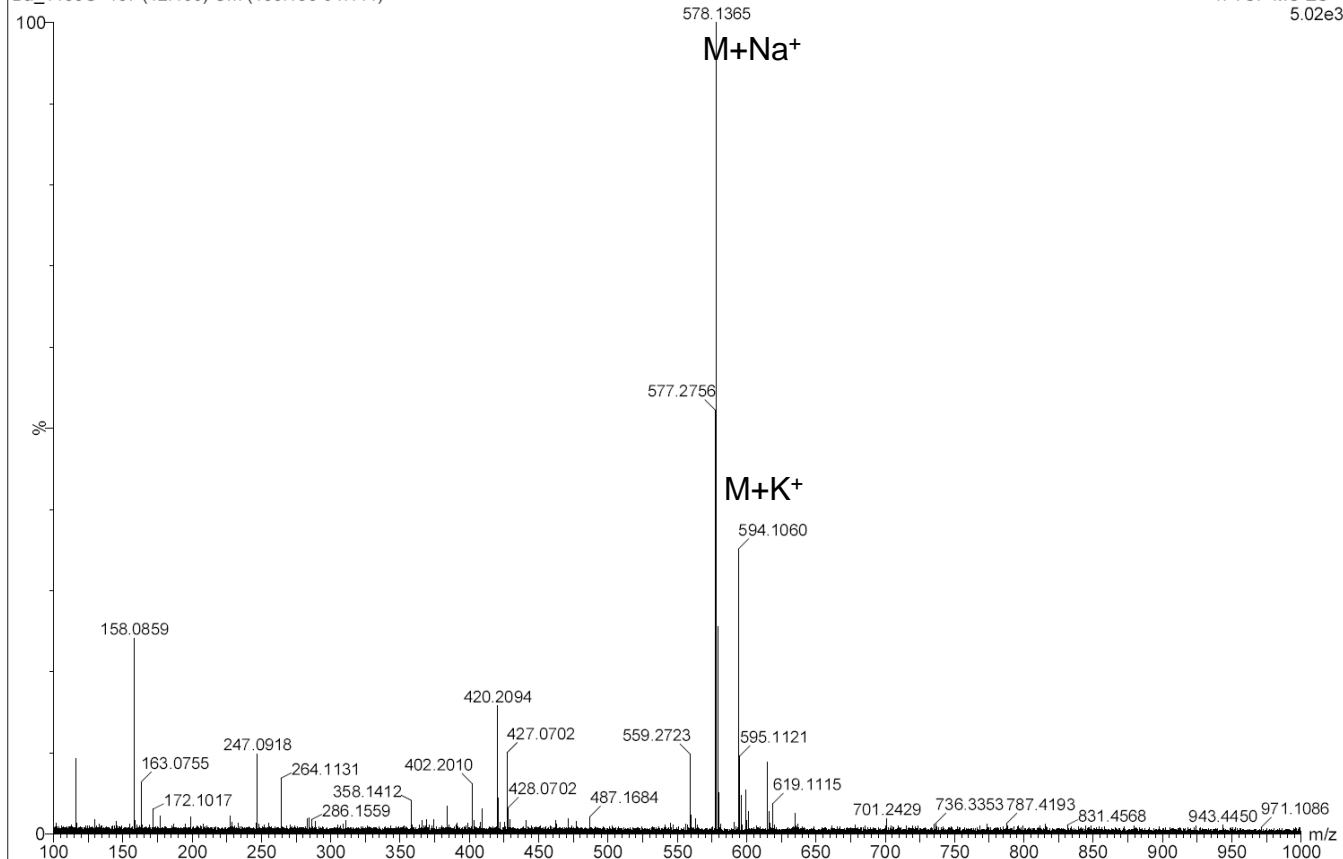

Supplement: Supplementary file 1 [file 4554904]
